# Supplementary material for: Blenderised Tube Feeds vs. Commercial Formula: Which Is Better for Gastrostomy-Fed Children?
Source: MDPI journal article supplement (doi:10.3390/nu14153139), 2022-07-29
Supplement: s1 [file s1]

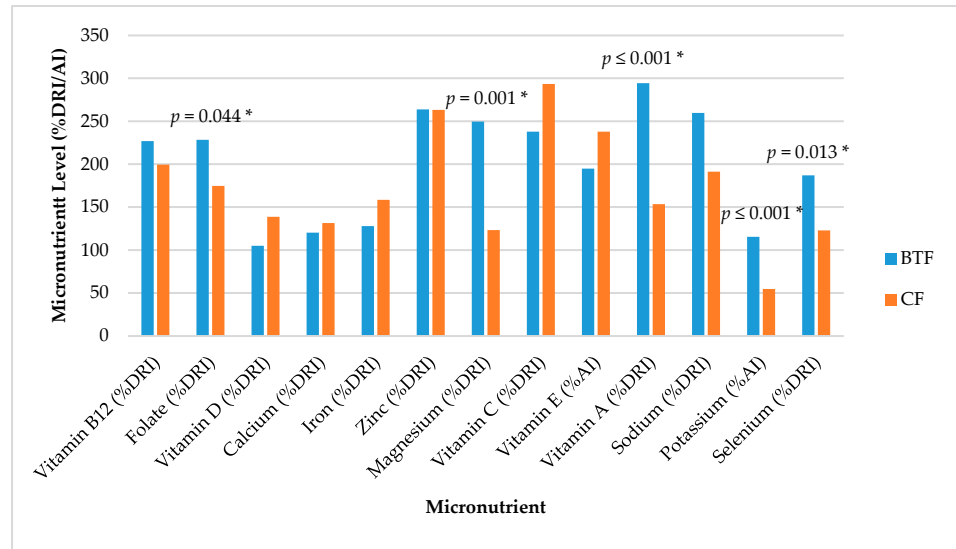

**Figure S1.** Comparison of Micronutrient content of blenderised tube feeds (BTF) and commercial formula (CF) Diets. AI, Adequate Intake; RDI, Recommended Dietary Intake. Results are mean %RDI or %AI. \* Statistically significant ( $p < 0.05$ ).

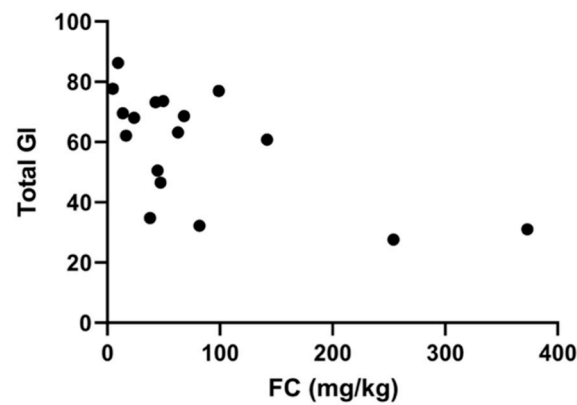

**Figure S2.** Correlation between fecal Calprotectin (FC) levels and total GI-Peds-QL questionnaire results. GI-Peds-QL, Paediatric Quality of Life Inventory Gastrointestinal Symptoms Scale; GI, gastrointestinal.
